# Supplementary material
Source: PubMed Central journal article supplement (PMC3961497)

**A**

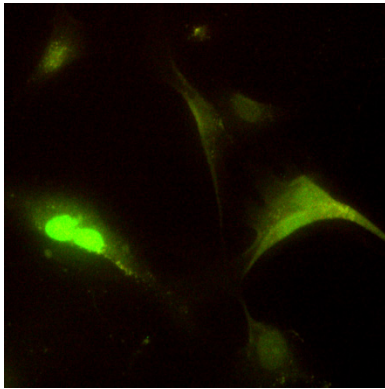

**anti-HA (Osx)**

**B**

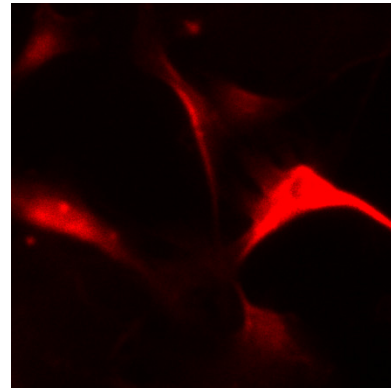

**anti-Bsp**

**C**

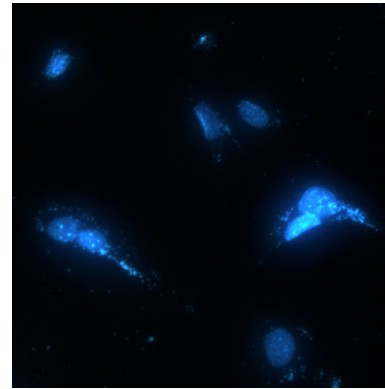

**DAPI**

**D**

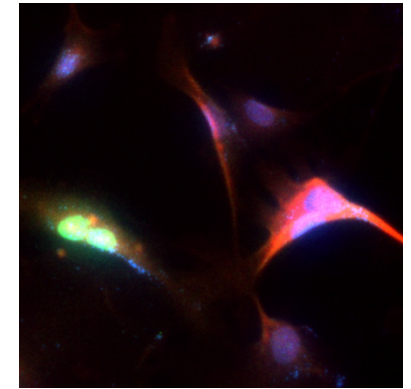

**merged**

region III

Native DNA  
Converted DNA

G A C G A C T  
G A C G A T T

C T C G A A C G C T G T A A T G T T  
T T C G A A C G T T G T A A T G T T

Wt

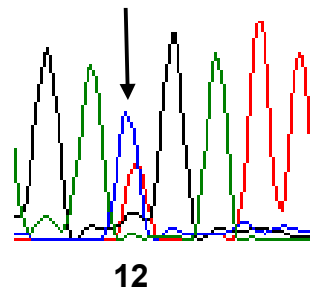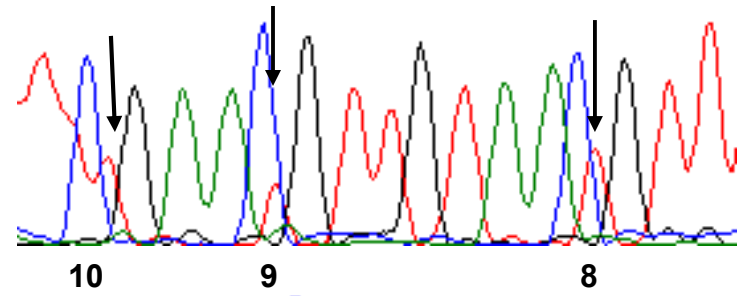

mt

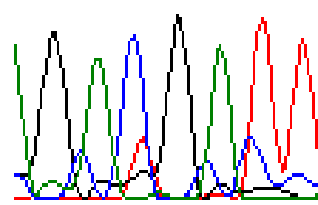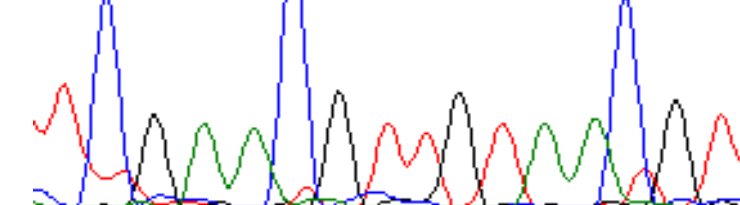

ES

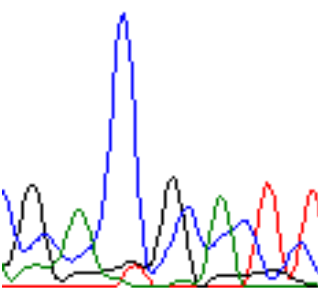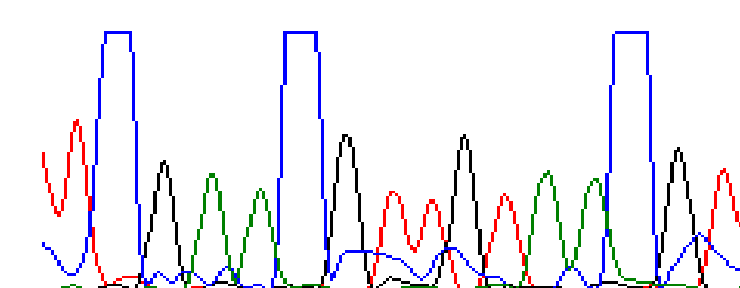

region II

Native DNA  
Converted DNA

T C T T G G G T T C T T A G C A C C G T G A A  
T T T T G G G T T T T T A G T A T T G T G A A

Wild-type  
(E18.5)

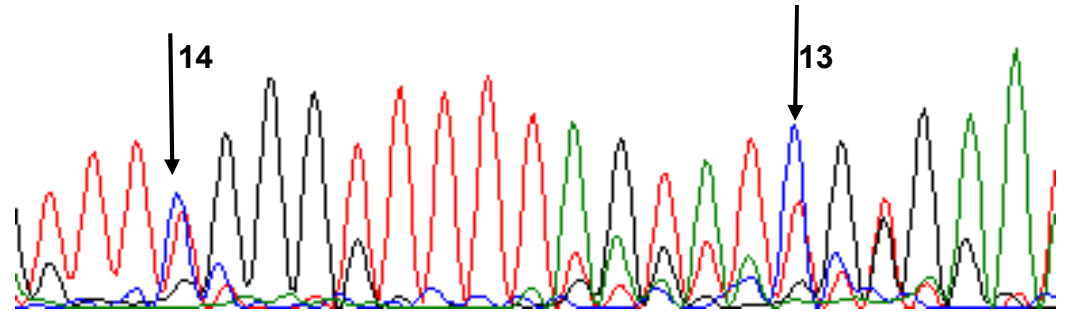

Osx-null  
E18.5

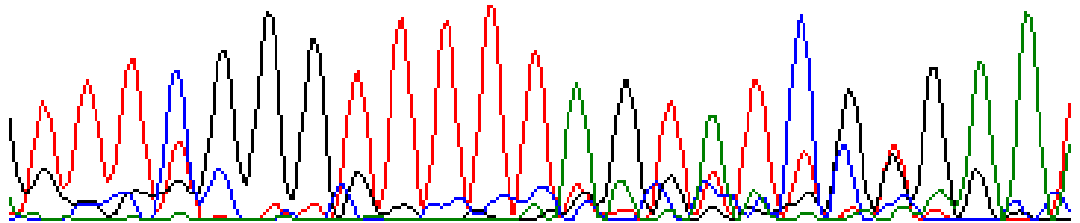

ES

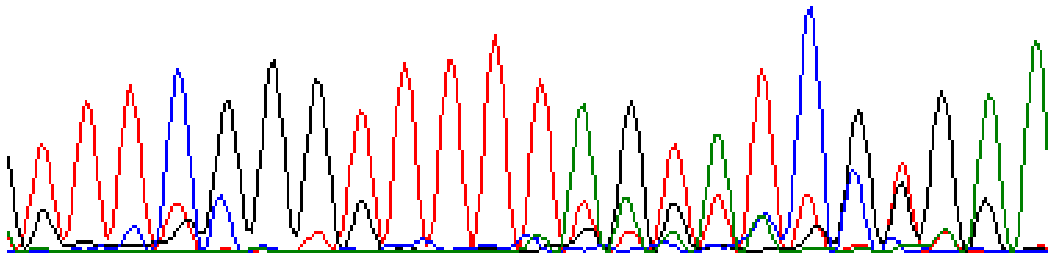

Supplement: NIHMS531557-supplement-Supp_Figure_S1-S3.pdf [file NIHMS531557-supplement-Supp_Figure_S1-S3.pdf]
